# Supplementary material for: Hypoxia-activated prodrug enhances therapeutic effect of sunitinib in melanoma
Source: PubMed Central journal article supplement (PMC5777760; doi:10.18632/oncotarget.22944), 2017-12-05
Supplement: oncotarget-08-115140-s001.pdf [file oncotarget-08-115140-s001.pdf]

## Hypoxia-activated prodrug enhances therapeutic effect of sunitinib in melanoma

### SUPPLEMENTARY MATERIAL

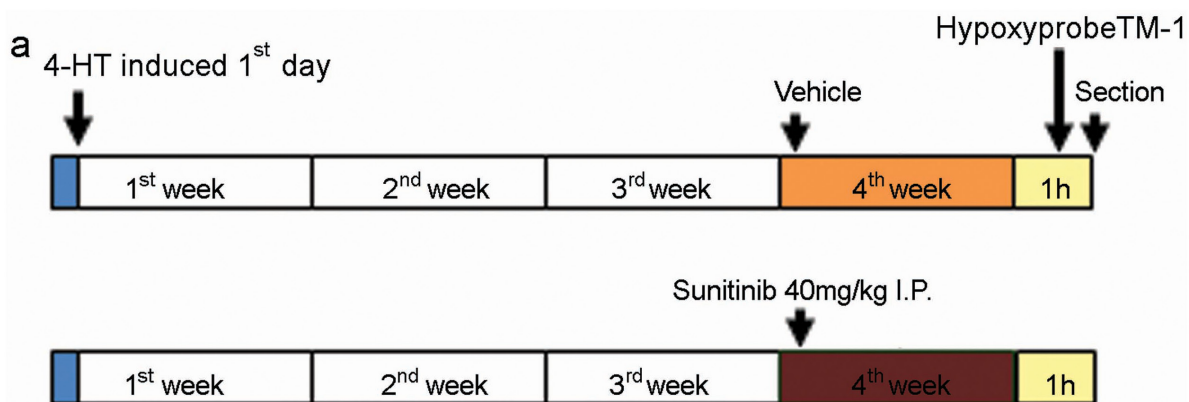

**Supplementary Figure 1: Short-term sunitinib increases tumor hypoxia in the GEM melanoma model.** Melanomas were induced and allowed to grow for 3 weeks until they were palpable. These mice were then treated for one week with either vehicle control or sunitinib (40mg/kg I.P.) after which they were sacrificed. Tumor tissues were then snap frozen for further analysis.
